# Supplementary material for: Transformation of potassium Lindquist hexaniobate to various potassium niobates: solvothermal synthesis and structural evolution mechanism
Source: Royal Society of Chemistry journal article supplement (doi:10.1039/c3dt00062a), 2013-01-01
Supplement: c3dt00062a.pdf [file c3dt00062a.pdf]

## Supporting Information

# Transformation of Potassium Lindquist Hexaniobate to Various Potassium Niobates: Solvothermal Synthesis and Structural Evolution Mechanism

Xingang Kong<sup>a</sup>, Dengwei Hu<sup>b</sup>, Puhong Wen<sup>c</sup>, Tomohiko Ishii<sup>b</sup>, Yasuhiro Tanaka<sup>b</sup>, and Qi Feng<sup>\*b</sup>

<sup>a</sup> School of Materials Science and Engineering, Shaanxi University of Science and Technology, Weiyang, Xi'an, Shaanxi 710021, PR China

<sup>b</sup> Department of Advanced Materials Science, Faculty of Engineering, Kagawa University, 2217-20 Hayashi-cho, Takamatsu-shi, 761-0396 Japan

<sup>c</sup> Department of Chemistry and Chemical Engineering, Baoji University of Arts and Science, 1 Gaoxin Road, Baoji, Shaanxi 721013, PR China

\*Tel: +81(0)87-864-2402. Fax: +81(0)87-864-2402. E-mail: [feng@eng.kagawa-u.ac.jp](mailto:feng@eng.kagawa-u.ac.jp)

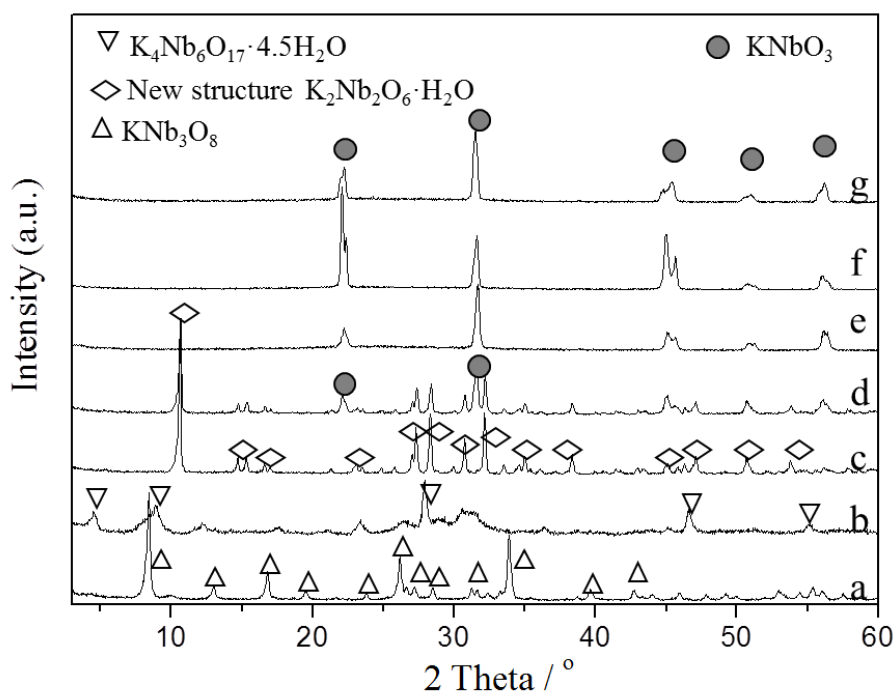

Figure S1 XRD patterns of samples obtained by solvothermal treatment of potassium hexaniobate in (a) pH=5.5, (b) KOH-0.1mol/L, (c) KOH-0.3mol/L, (d) KOH-0.5mol/L, (e) KOH-1.0mol/L, (f) KOH-2.0mol/L, (g) KOH-3.0mol/L water-ethanol (volume ratio=1/2) solution at 230 °C for 12h, respectively.

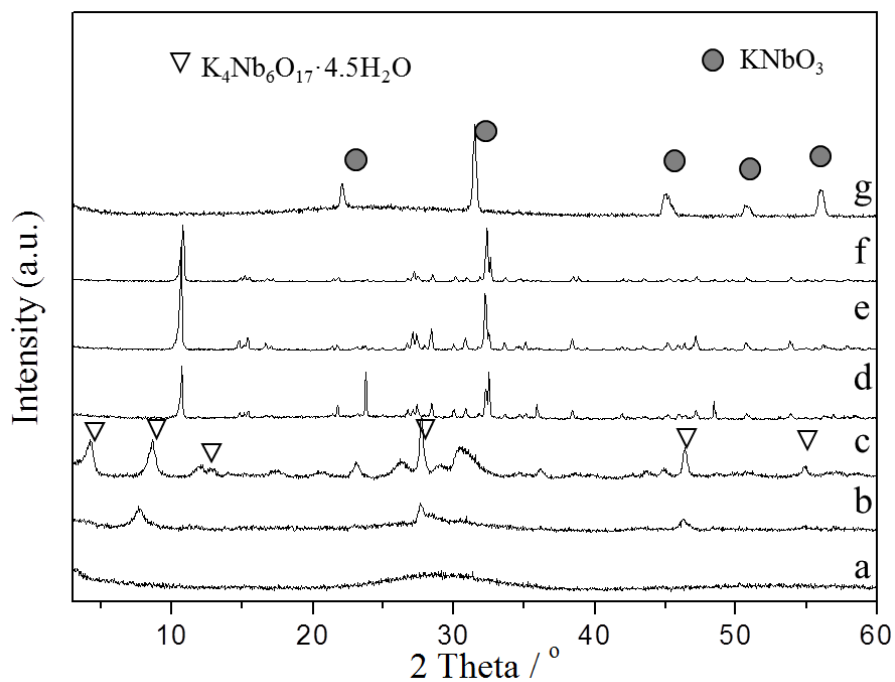

Figure S2. XRD patterns of samples obtained by solvothermal treatment of potassium hexaniobate in (a) pH=5.5, (b) KOH-0.1mol/L, (c) KOH-0.3mol/L, (d) KOH-0.5mol/L, (e) KOH-1.0mol/L, (f) KOH-2.0mol/L, (g) KOH-3.0mol/L water-ethanol (volume ratio=1/1) solution at 200 °C for 12h, respectively.

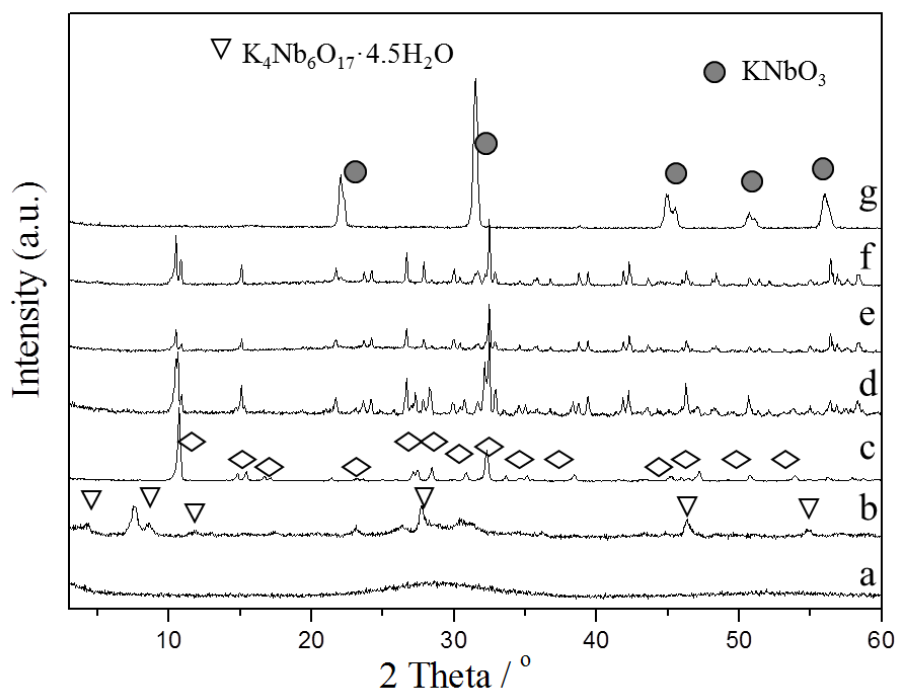

Figure S3 XRD patterns of samples obtained by solvothermal treatment of potassium hexaniobate in (a) pH=5.5, (b) KOH-0.1mol/L, (c) KOH-0.3mol/L, (d) KOH-0.5mol/L, (e) KOH-1.0mol/L, (f) KOH-2.0mol/L, (g) KOH-3.0mol/L water-ethanol (volume ratio=1/2) solution at 200 °C for 12h, respectively.

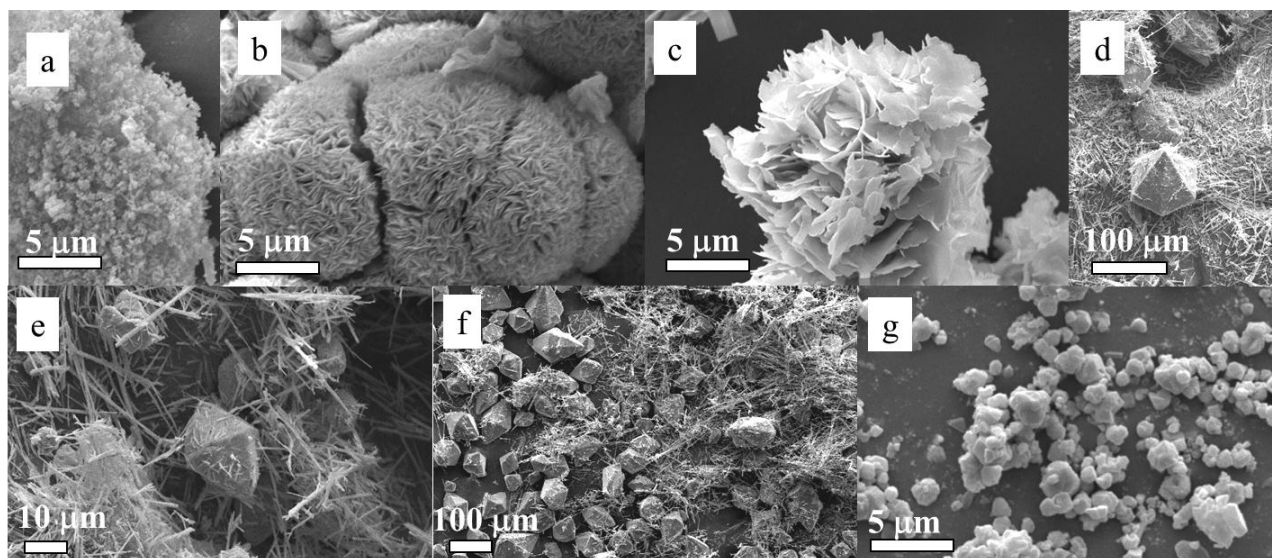

Figure S4. SEM images of samples obtained by solvothermal treatment of potassium hexaniobate in (a) pH=5.5, (b) KOH-0.1mol/L, (c) KOH-0.3mol/L, (d) KOH-0.5mol/L, (e) KOH-1.0mol/L, (f) KOH-2.0mol/L, (g) KOH-3.0mol/L water-ethanol (volume ratio=1/1) solution at 200 °C for 12h, respectively.

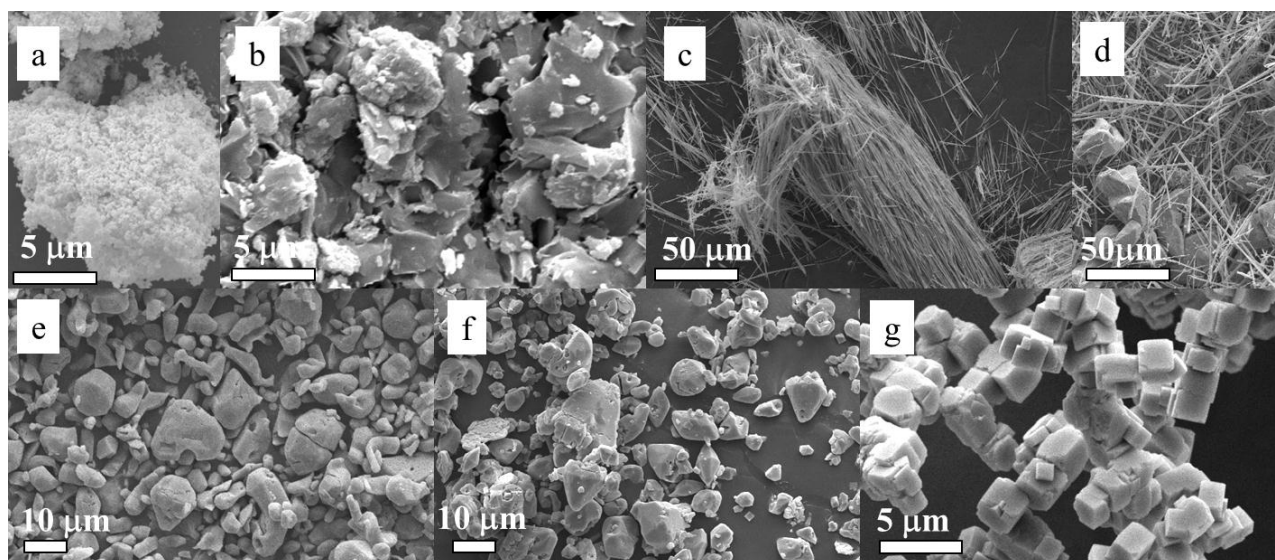

Figure S5 SEM images of samples obtained by solvothermal treatment of potassium hexaniobate in (a) pH=5.5, (b) KOH-0.1mol/L, (c) KOH-0.3mol/L, (d) KOH-0.5mol/L, (e) KOH-1.0mol/L, (f) KOH-2.0mol/L, (g) KOH-3.0mol/L water-ethanol (volume ratio=1/2) solution at 200 °C for 12h, respectively.

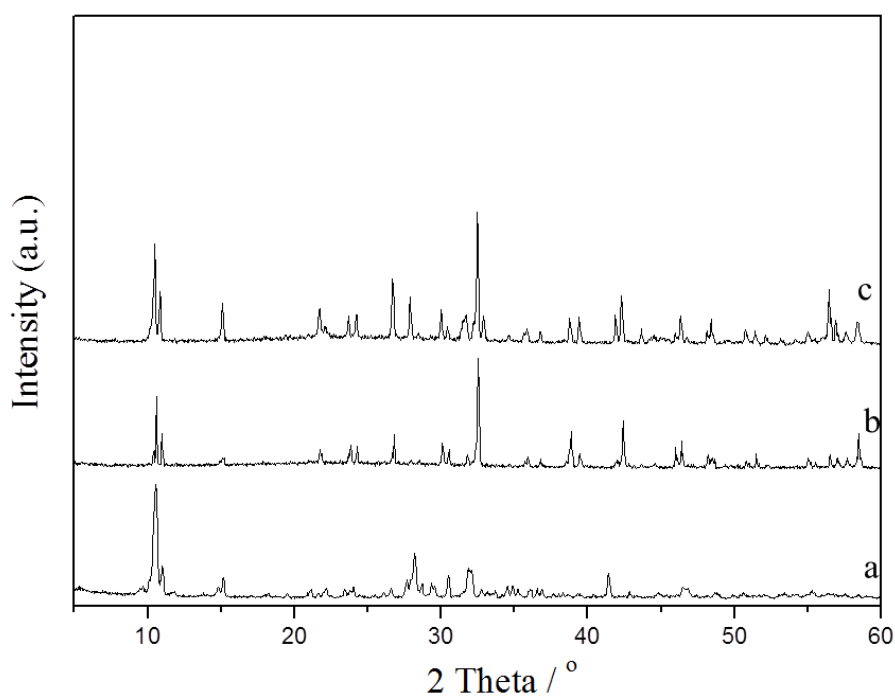

Figure S6 XRD patterns of (a) potassium hexaniobate precursor, (b)  $K_{8-x}H_xNb_6O_{19}$  with dodecahedral morphology and (c)  $K_{8-x}H_xNb_6O_{19}$  with irregular morphology.

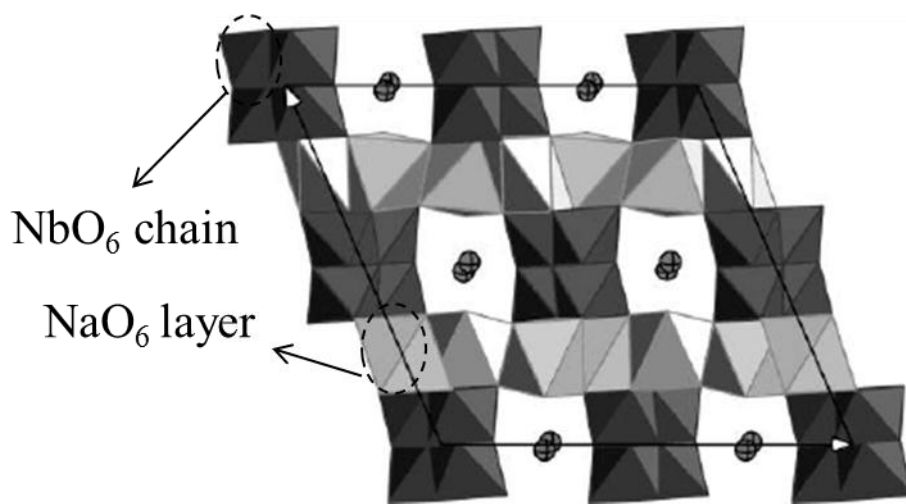

Figure S7. Crystal structure of Na<sub>2</sub>Nb<sub>2</sub>O<sub>6</sub>·H<sub>2</sub>O projected down [010].<sup>45</sup>

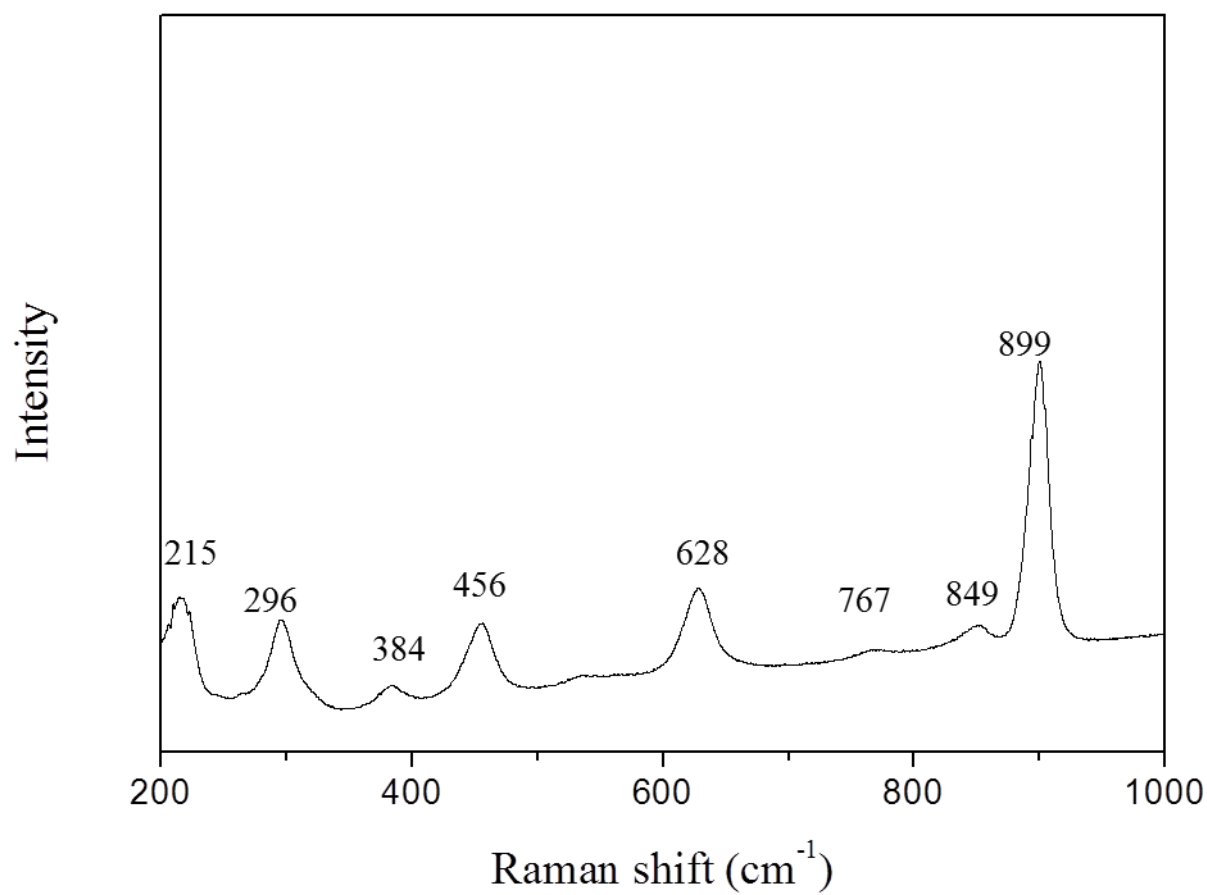

Figure S8. Raman spectrum of K<sub>2</sub>Nb<sub>2</sub>O<sub>6</sub>·H<sub>2</sub>O.

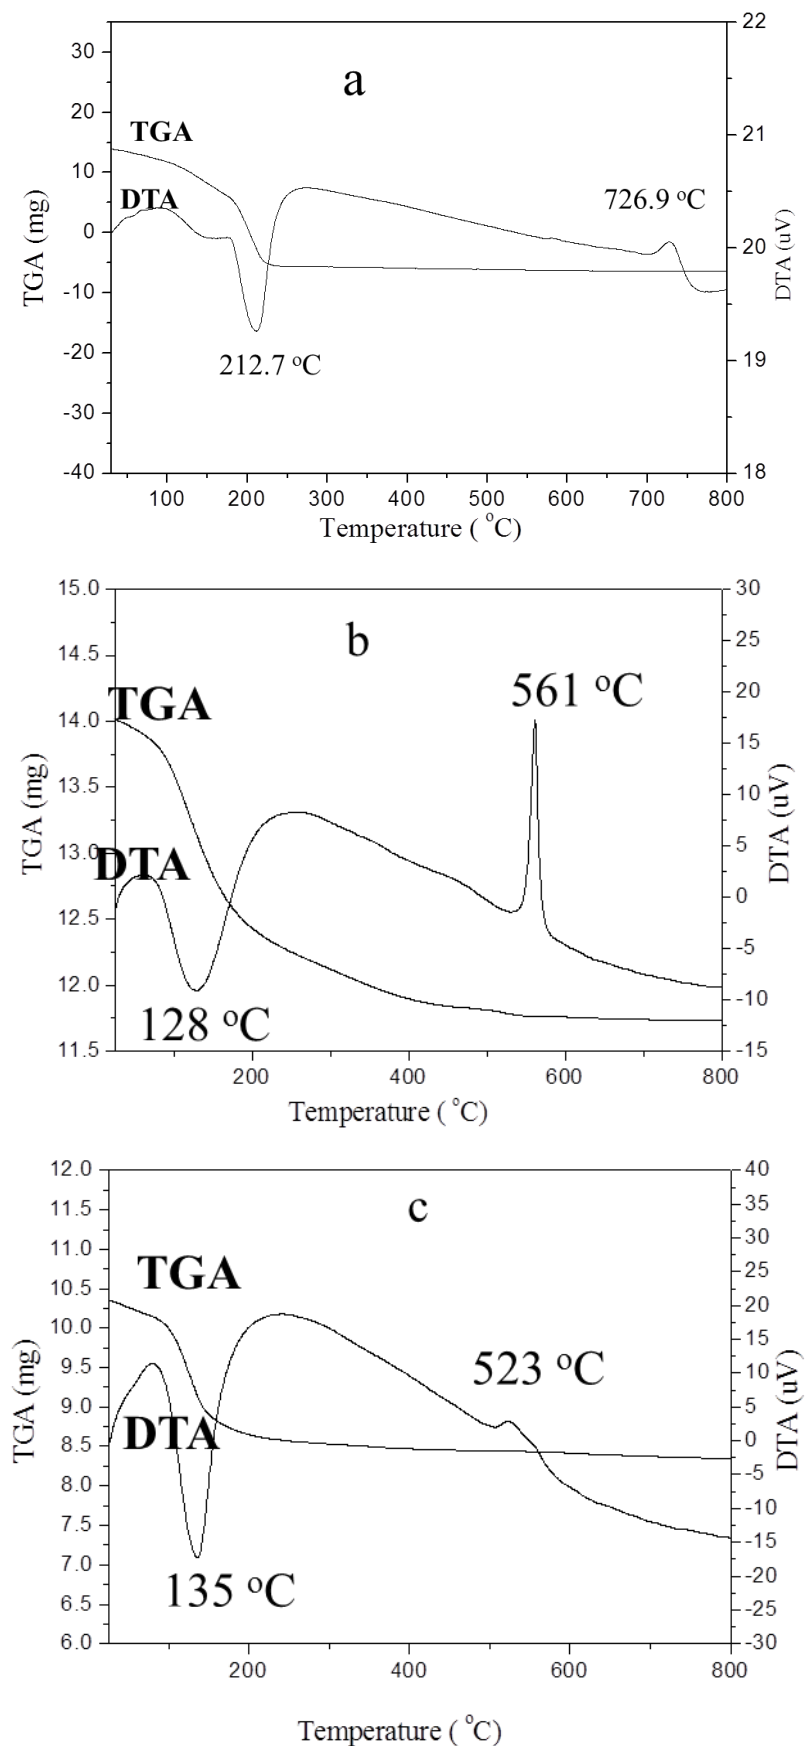

Figure S9. TG-DTA curves of (a) the  $K_2Nb_2O_6 \cdot H_2O$  niobate fiber, (b)  $H^+$ -exchanged  $K_2Nb_2O_6 \cdot H_2O$  and (c)  $Li^+$ -exchanged  $K_2Nb_2O_6 \cdot H_2O$ .
